# Supplementary material for: Profiling the neutralizing antibody response in chronically HIV-1 CRF07_BC-infected intravenous drug users naïve to antiretroviral therapy
Source: PubMed Central journal article supplement (PMC5384219; doi:10.1038/srep46308), 2017-04-07
Supplement: srep46308-s1.pdf [file srep46308-s1.pdf]

**Supplementary Information (SI) for**

**Profiling the neutralizing antibody response in chronically HIV-1**

**CRF07\_BC-infected intravenous drug users naïve to antiretroviral therapy**

Xintao Hu<sup>1,§,†</sup>, Yuanyuan Hu<sup>1,†</sup>, Chunhong Zhao<sup>1</sup>, Hongmei Gao<sup>2</sup>, Kelli Greene<sup>2</sup>, Li Ren<sup>1</sup>, Liying Ma<sup>1</sup>, Yuhua Ruan<sup>1</sup>, Marcella Sarzotti-Kelsoe<sup>2,3</sup>, David C. Montefiori<sup>2</sup>, Kunxue Hong<sup>1,\*</sup>, Yiming Shao<sup>1,\*</sup>

<sup>1</sup>State Key Laboratory of Infectious Disease Prevention and Control, National Center for AIDS/STD Control and Prevention, Chinese Center for Disease Control and Prevention, Collaborative Innovation Center for Diagnosis and Treatment of Infectious Diseases, Beijing 102206, PR China.

<sup>2</sup>Departments of Experimental Surgery and <sup>3</sup>Immunology, Duke University Medical Center, Durham, North Carolina 27710, USA

<sup>§</sup>Current affiliation: Human Retrovirus Pathogenesis Section, Vaccine Branch, Center for Cancer Research, National Cancer Institute, Frederick, Maryland 21702, USA

† these authors contributed equally to this work

**\*Corresponding author:** Kunxue Hong & Yiming Shao

Tel: 86-10-58900981; Fax: 86-10-58900980

Email: hongkx@chinaaids.cn; yshao08@gmail.com

**This file includes:**

Supplementary Tables S1-4; Supplementary Figures S1-5

**Table S1:** Major characteristics of IDU cohort.

| Category                                          | Site            |                |              |
|---------------------------------------------------|-----------------|----------------|--------------|
|                                                   | Xinjiang (n=66) | Sichuan (n=32) | Total (n=98) |
| Age (years; mean±SD)                              | 32.7±5.1        | 32.8±6.8       | 32.7±5.7     |
| Gender [% (n)]                                    |                 |                |              |
| Male                                              | 81.8(54)        | 84.4(27)       | 83(81)       |
| Female                                            | 18.2 (12)       | 15.6(5)        | 17(17)       |
| Ethnic Group [% (n)]                              |                 |                |              |
| Uygur                                             | 81.8(54)        | 0(0)           | 55(54)       |
| Han                                               | 16.7(11)        | 78.1(25)       | 37(36)       |
| Yi                                                | 0(0)            | 21.9(7)        | 7(7)         |
| Hui                                               | 1.5(1)          | 0(0)           | 1(1)         |
| High-Risk behavior [n (%)]                        |                 |                |              |
| Intravenous drug use                              | 66(100.0)       | 32(100.0)      | 98(100.0)    |
| Former plasma donation                            | 0               | 0              | 0            |
| HIV-1 subtype/CRF                                 | CRF07_BC        | CRF07_BC       | CRF07_BC     |
| CD4 count number (cells/mm <sup>3</sup> ; median) | 341             | 404            | 378          |
| (range)                                           | (50-940)        | (118-834)      | (50-940)     |
| Viral load (copies/ml; median)                    | 27900           | 9930           | 20700        |
| (range)                                           | (<50-563000)    | (<50-714000)   | (<50-714000) |
| Infection Length (years)                          |                 | 3-5            |              |

**Table S2:** Summary of top 6 neutralizers from both cohorts.

| Patient ID<br>(#code) | Site     | Gender | Age | Ethnic | Infection<br>via* | CD4 Count<br>(cells/mm <sup>3</sup> ) | Plasma RNA Viral Load<br>(copies/ml) | NAb breadth<br>(%) | NAb potency<br>(GMT) | Subtype  |
|-----------------------|----------|--------|-----|--------|-------------------|---------------------------------------|--------------------------------------|--------------------|----------------------|----------|
| DRVI01                | Anhui    | M      | 44  | Han    | FPD               | 512                                   | 268000                               | 96                 | 302.2                | B'       |
| DRVI02                | Anhui    | M      | 48  | Han    | FPD               | 268                                   | 85600                                | 96                 | 256.6                | B'       |
| DRVI03                | Anhui    | M      | 35  | Han    | FPD               | 373                                   | 79800                                | 100                | 185.7                | B'       |
| F438                  | Anhui    | M      | 47  | Han    | FPD               | 480                                   | 93800                                | 96                 | 143.7                | B'       |
| F433                  | Anhui    | M      | 39  | Han    | FPD               | 453                                   | 51500                                | 91                 | 102.8                | B'       |
| F521                  | Anhui    | F      | 65  | Han    | FPD               | 997                                   | 202000                               | 96                 | 101                  | B'       |
| I415                  | Sichuan  | M      | 42  | Han    | IDU               | 310                                   | 6420                                 | 97                 | 295.9                | CRF07_BC |
| I533                  | Xinjiang | M      | 35  | Wei    | IDU               | 57 <sup>#</sup>                       | 236000                               | 90                 | 234.7                | CRF07_BC |
| I534                  | Xinjiang | M      | 27  | Wei    | IDU               | 164 <sup>#</sup>                      | 277000                               | 97                 | 173.6                | CRF07_BC |
| I404                  | Sichuan  | M      | 25  | Yi     | IDU               | 542                                   | 116000                               | 93                 | 166.4                | CRF07_BC |
| I357                  | Xinjiang | M      | 38  | Wei    | IDU               | 628                                   | 10500                                | 83                 | 164.9                | CRF07_BC |
| I535                  | Xinjiang | M      | 32  | Wei    | IDU               | 336                                   | 144000                               | 100                | 160.4                | CRF07_BC |

\*FPD: former plasma donation; IDU: intravenous drug use

<sup>#</sup>demonstrating the participants who initiated free antiretroviral therapy upon first detection of CD4 counts below 200

**Table S3:** Concentration determined by quantitative ELISA for top 6 plasma samples in both cohorts.

| FPD cohort            |                                             | IDU cohort          |                                             |
|-----------------------|---------------------------------------------|---------------------|---------------------------------------------|
| Sample ID#            | Concentration ( $\mu\text{g}/\mu\text{l}$ ) | Sample ID#          | Concentration ( $\mu\text{g}/\mu\text{l}$ ) |
| DRVI01-P <sup>a</sup> | 29.2                                        | I415-P <sup>a</sup> | 15.2                                        |
| DRVI01-G <sup>b</sup> | 10.8                                        | I415-G <sup>b</sup> | 7.2                                         |
| DRVI02-P <sup>a</sup> | 24.2                                        | I404-P <sup>a</sup> | 14.8                                        |
| DRVI02-G <sup>b</sup> | 7.7                                         | I404-G <sup>b</sup> | 8.5                                         |
| DRVI03-P <sup>a</sup> | 18.3                                        | I357-P <sup>a</sup> | 15.7                                        |
| DRVI03-G <sup>b</sup> | 6.5                                         | I357-G <sup>b</sup> | 6.4                                         |
| F438-P <sup>a</sup>   | 10.4                                        | I533-P <sup>a</sup> | 13.6                                        |
| F438-G <sup>b</sup>   | 4.0                                         | I533-G <sup>b</sup> | 6.0                                         |
| F433-P <sup>a</sup>   | 11.8                                        | I534-P <sup>a</sup> | 15.7                                        |
| F433-G <sup>b</sup>   | 5.6                                         | I534-G <sup>b</sup> | 6.8                                         |
| F521-P <sup>a</sup>   | 17.5                                        | I535-P <sup>a</sup> | 13.5                                        |
| F521-G <sup>b</sup>   | 6.6                                         | I535-G <sup>b</sup> | 8.6                                         |

<sup>a</sup> P indicates plasma sample and <sup>b</sup> G represents for IgG fraction

**Table S4:** Matched virus panel for both cohorts used for inter-subtype comparison.

| Subtype        | Virus Strain | Subtype        | Virus Strain            |
|----------------|--------------|----------------|-------------------------|
| B (n=7)        | QH0692.42    | C (n=4)        | Du422.1                 |
|                | SC422661.8   |                | ZM249M.PL1              |
|                | PVO.4*       |                | ZM109F.PB4 <sup>†</sup> |
|                | RHPA4259.7   |                | CAP45.2.00.G3           |
|                | REJO4541.67  | A (n=4)        | Q461.e2                 |
|                | TRJO4551.58* |                | Q769.d22                |
|                | CAAN5342.A2  |                | Q259.d2.17              |
| CRF07_BC (n=4) | CH110.2      | CRF01_AE (n=3) | Q842.d12                |
|                | CH117.4      |                | BM2249                  |
|                | CH120.6*     |                | BM2316                  |
|                | CH181.12     | BM2498         |                         |

Note: \* indicates Tier 3 virus, <sup>†</sup> indicates Tier 1B virus

# Supplementary Figure S1

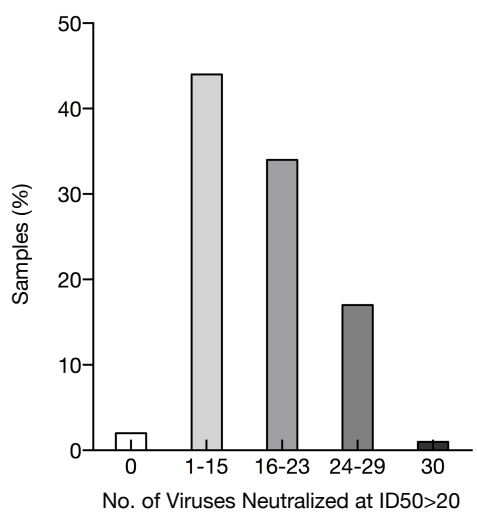

**Figure S1: Distribution of neutralization breadth among the overall plasma sample population.** Neutralization breadth is defined as the percentage of strains neutralized at a detectable titer (ID<sub>50</sub>>20) by individual plasma sample out of the 30 strains tested (the two tier 1 viruses, MW965.26 and SF162.LS excluded). Each bar indicates the percentage of samples, out of 98 in total, neutralized by the corresponding number of viruses as indicated on the x-axis.

# Supplementary Figure S2

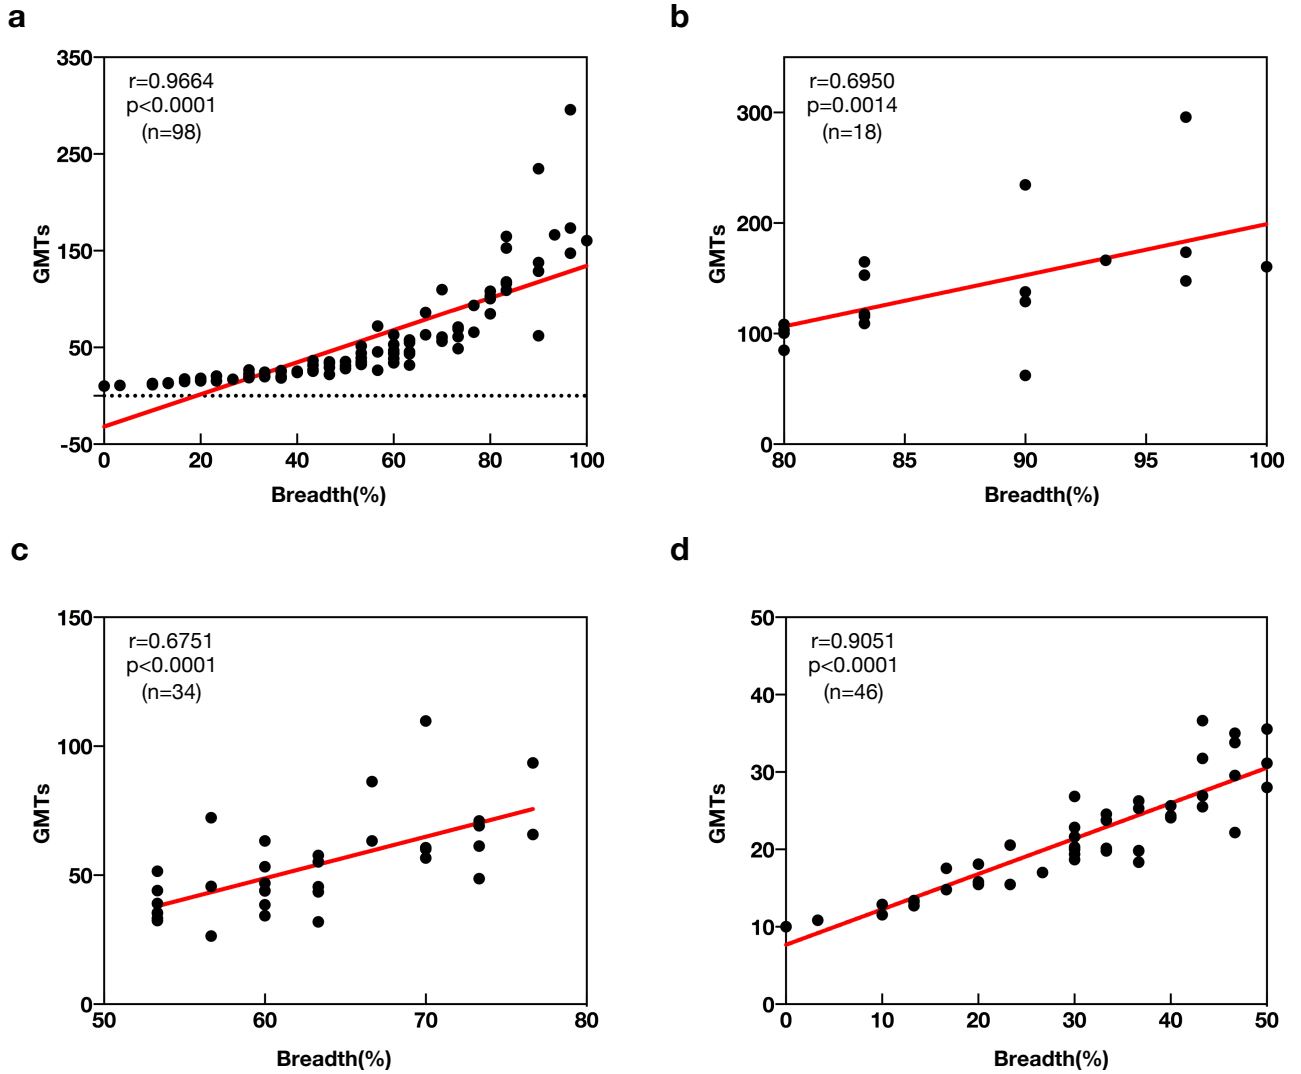

**Figure S2: Correlation between NAb breadth and potency in IDU cohort.**

For the different population (a: overall samples; b: BCN samples; c: M-BCN samples; D: non-BCN samples), the neutralization magnitudes are compared with neutralization breadth, respectively. P-values (two-tailed) and R-values are based on the Spearman's rank test.

# Supplementary Figure S3

**a**

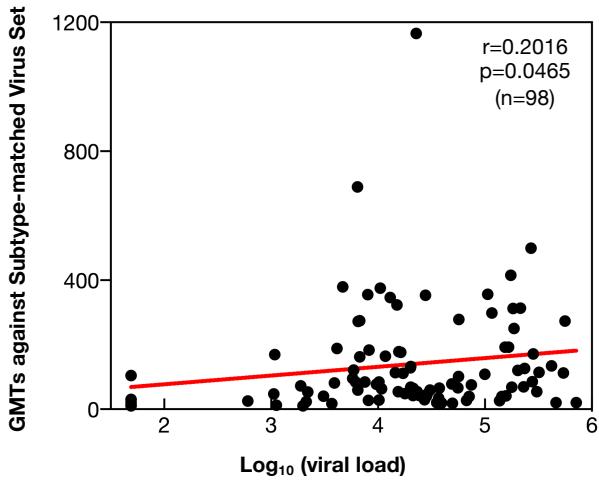

**b**

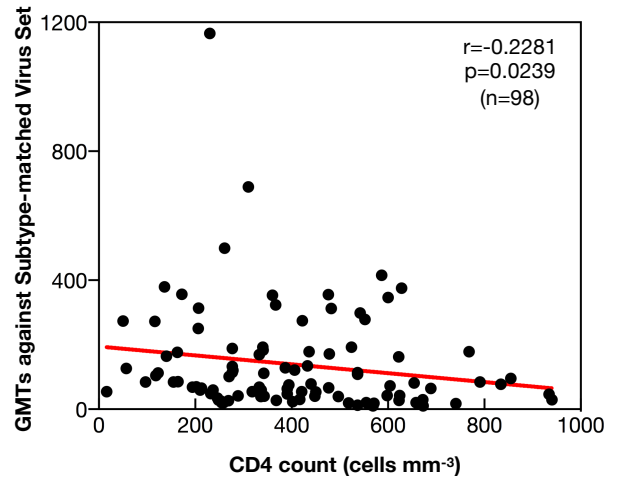

**c**

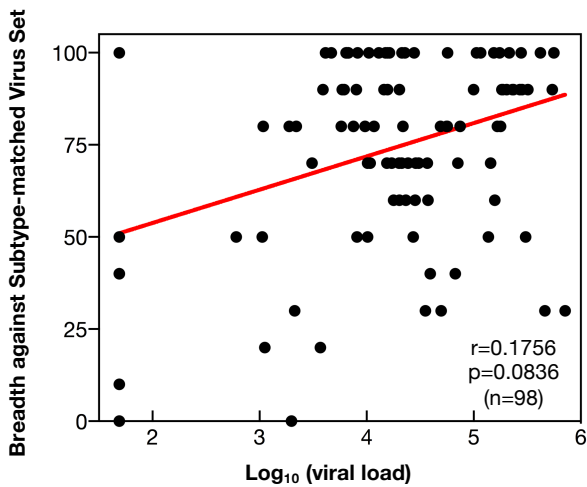

**d**

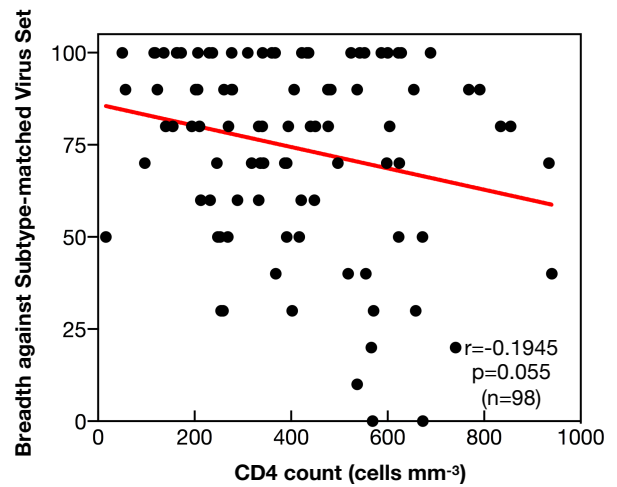

## Figure S3: Correlation between neutralization magnitude against subtype-matched virus set and plasma viral loads/CD4 counts in IDU cohort.

For the total population of 98 samples, the neutralization magnitudes against subtype-matched virus set of NAb response are compared with individuals' viral load (a) and CD4 counts (b), respectively. Similarly, the neutralization breadth (%) against subtype-matched virus set of NAb response are compared with individuals' viral load (c) and CD4 counts (d), respectively. P-values (two-tailed) and R-values are based on the Spearman's rank test.



# Supplementary Figure S4

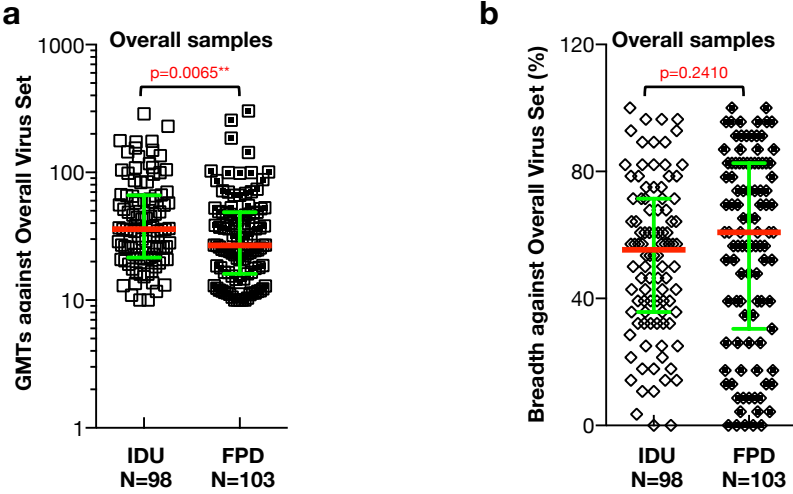

**Figure S4: Comparison of NAb magnitude and breadth against overall virus set between FPD and IDU cohort.**

The difference of NAb magnitude (a) or breadth (b) against overall virus set between IDU and FPD cohort is illustrated for the overall sample population. P-values (two-tailed) are based on the Mann-Whitney U test. The error bars show the median with the interquartile range. The Significant difference between each group is indicated: \*0.01<P<0.05; \*\*0.001<P<0.01; \*\*\*P<0.001 ; \*\*\*\*P<0.0001 (Mann-Whitney U test).

Supplementary Figure S5

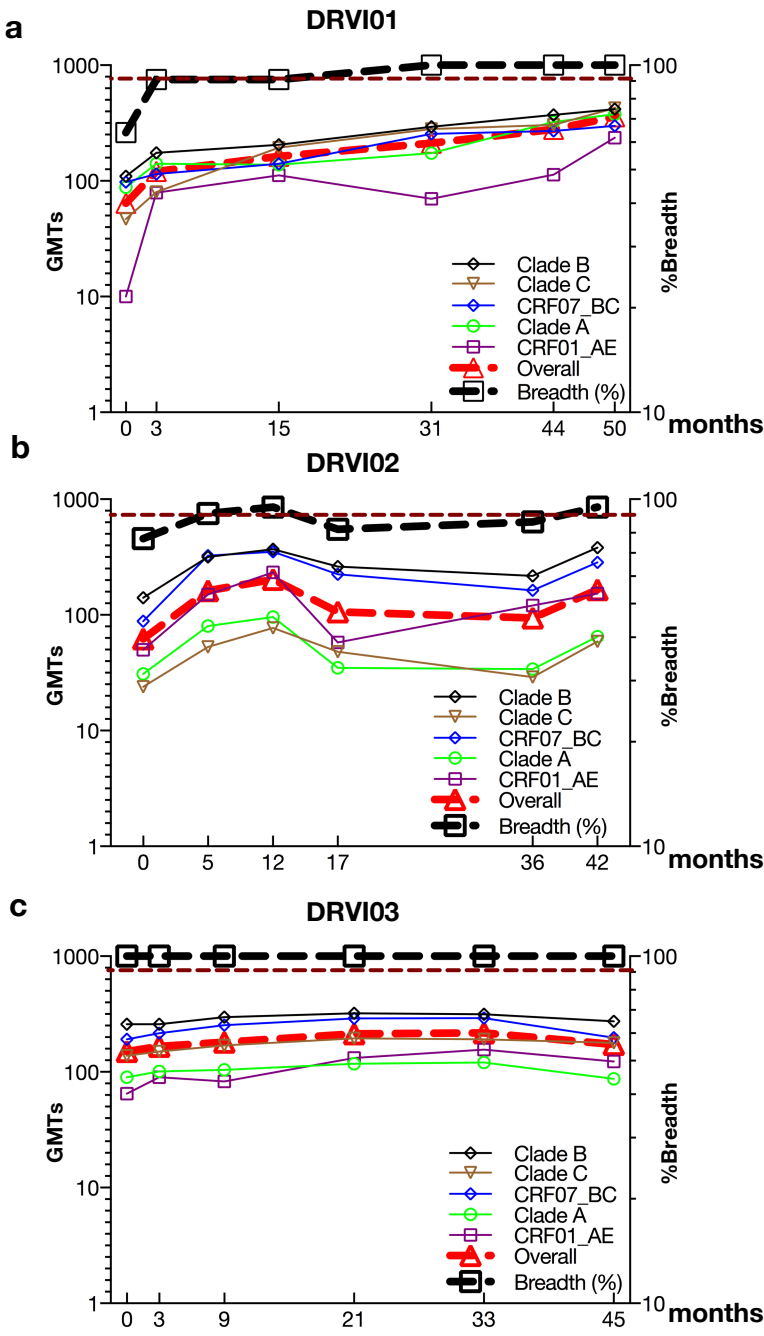

**Figure S5: Dynamics of top 3 plasma neutralization activity evolution in FPD cohort.** Six time points (months) of top three plasma samples (DRVI01 (a), DRVI02 (b) and DRVI03 (c)) from FPD cohort are shown on the x-axis. The y-axis (left) values represent the GMTs of plasma neutralization against corresponding subtype-specific/overall virus set, and the y-axis (right) shows the neutralization breadth (%) against overall virus set. The dark red dotted line representing 90% breadth threshold was plotted in each sample's figure. Plasma samples with approximately 3-16, 5-19, and 3-12 month intervals for DRVI01, DRVI02, DRVI03, respectively, were analyzed.
